# Supplementary material
Source: PubMed Central journal article supplement (PMC4617185)
Supplement: NIHMS720175-supplement-1.pdf [file NIHMS720175-supplement-1.pdf]

## SUPPLEMENTAL DATA

## TABLES

**Supplementary Table 1:** Characteristics of monkeys in designated IL-7 treatment groups.

| <b>RM#</b> | <b>Age (years)</b> | <b>Gender</b> | <b># of IL-7 doses (30µg/Kg)</b> | <b>Surgery</b> |
|------------|--------------------|---------------|----------------------------------|----------------|
| 11901      | 28                 | Female        | 7 single doses                   | N/A            |
| 12329      | 26                 | Male          | 7 single doses                   | N/A            |
| 12334      | 26                 | Male          | 7 single doses                   | N/A            |
| 13807      | 23                 | Female        | 7 single doses                   | N/A            |
| 18325      | 22                 | Female        | 7 single doses                   | N/A            |
| 20084      | 22                 | Male          | 7 single doses                   | N/A            |
| 20097      | 21                 | Male          | 7 single doses                   | N/A            |
| 18844      | 13                 | Female        | 7 single doses                   | N/A            |
| 19819      | 11                 | Male          | 7 single doses                   | N/A            |
| 19830      | 11                 | Male          | 7 single doses                   | N/A            |
| 20445      | 11                 | Female        | 7 single doses                   | N/A            |
| 11692      | 28                 | Female        | 9 clustered doses                | N/A            |
| 13804      | 24                 | Female        | 9 clustered doses                | N/A            |
| 13820      | 24                 | Female        | 9 clustered doses                | N/A            |
| 17523      | 23                 | Female        | 9 clustered doses                | N/A            |
| 20079      | 24                 | Female        | 9 clustered doses                | N/A            |
| 20123      | 24                 | Female        | 9 clustered doses                | N/A            |
| 19820      | 12                 | Male          | 9 clustered doses                | N/A            |
| 19875      | 11                 | Male          | 9 clustered doses                | N/A            |
| 19998      | 11                 | Female        | 9 clustered doses                | N/A            |
| 21213      | 10                 | Female        | 9 clustered doses                | N/A            |
| 19620      | 12                 | Male          | 9 clustered doses                | N/A            |
| 25589      | 2.2                | Male          | 2 single doses                   | Thymectomy     |
| 25816      | 1.9                | Male          | 2 single doses                   | Thymectomy     |
| 24984      | 3.9                | Male          | 2 single doses                   | Thymectomy     |
| 25159      | 3.9                | Male          | 2 single doses                   | Thymectomy     |
| 25166      | 3.9                | Male          | 2 single doses                   | Thymectomy     |
| 25180      | 3.7                | Male          | 2 single doses                   | Thymectomy     |
| 25813      | 1.9                | Male          | 2 single doses                   | Sham           |
| 26153      | 2                  | Male          | 2 single doses                   | Sham           |
| 25325      | 3.8                | Male          | 2 single doses                   | Sham           |
| 25762      | 2.9                | Male          | 2 single doses                   | Sham           |
| 25771      | 2.7                | Male          | 2 single doses                   | Sham           |
| 25889      | 2.8                | Male          | 2 single doses                   | Sham           |

**Supplementary Table 2:** Oligonucleotide primers used for spectratyping analysis of TCR V $\beta$  gene of RM (42).

| <b>V<math>\beta</math> and C<math>\beta</math> Primers</b> | <b>Sequences 5' – 3'</b>        | <b>References</b>       |
|------------------------------------------------------------|---------------------------------|-------------------------|
| RH V $\beta$ 1                                             | GCA CAA CAG TTC CCT GAC TTG CAC | Chen <i>et al.</i> 1993 |
| RH V $\beta$ 2                                             | CAT CAA CCA TCC AAA CCT GAC CT  | Chen <i>et al.</i> 1993 |
| RH V $\beta$ 3                                             | GTCTCTAGAGAGAAG GAG CGC         | Chen <i>et al.</i> 1993 |
| RH V $\beta$ 4                                             | ACA TAT GAG AGT GGA TTT GTC ATT | Chen <i>et al.</i> 1993 |
| RH V $\beta$ 5.3                                           | TGT GTC CTG GTA CCA ACA GG      | Chen <i>et al.</i> 1993 |
| RH V $\beta$ 6                                             | AGG ACT GAG GGA TCC GTC TC      | Chen <i>et al.</i> 1993 |
| RH V $\beta$ 7                                             | CCT GAA TGC TCC AAG AGCTCT C    | Chen <i>et al.</i> 1993 |
| RH V $\beta$ 8.1                                           | ATT TACTTT AACAAAC AAGTCT CCG   | Chen <i>et al.</i> 1993 |
| RH V $\beta$ 9                                             | TCT CCA GAC AAA GCT CAT TT      | Chen <i>et al.</i> 1993 |
| RH V $\beta$ 10                                            | CCC AAA ACT CAT CCT GTA CC      | Chen <i>et al.</i> 1993 |
| RH V $\beta$ 11-3                                          | TCAACAGTCTCCAGACTAAGGATAG       | Chen <i>et al.</i> 1993 |
| RH V $\beta$ 12                                            | AAA GGA GAA GTC TCA GAT         | Chen <i>et al.</i> 1993 |
| RH V $\beta$ 13.2                                          | ACG TGT CAC CAG ACT TGG A       | Chen <i>et al.</i> 1993 |
| RH V $\beta$ 14                                            | GTC TCT CGA AAA GAG AAG AGG AA  | Chen <i>et al.</i> 1993 |
| RH V $\beta$ 15                                            | GGG TAC AGT GTC TCT AGA GA      | Chen <i>et al.</i> 1993 |
| RH V $\beta$ 16                                            | CAG GAT GAG TCC GGT ATG CC      | Chen <i>et al.</i> 1993 |
| RH V $\beta$ 17                                            | GAT GAG TCA GGA ATG CCA AAG GAA | Chen <i>et al.</i> 1993 |
| RH V $\beta$ 18                                            | GAGTCAGGA ATG CCA AAGGA         | Chen <i>et al.</i> 1993 |
| RH V $\beta$ 19                                            | CAG ATA GTA AAT GAC ATT CA      | Chen <i>et al.</i> 1993 |
| RH V $\beta$ 20                                            | CAA TGC CCC AAG AAC CTA CC      | Chen <i>et al.</i> 1993 |
| RH V $\beta$ 21                                            | GAG AGG CTC AAA GGA GTA         | Chen <i>et al.</i> 1993 |
| RH V $\beta$ 22                                            | GGA AGC ATC CCT GAT CGA TT      | Chen <i>et al.</i> 1993 |
| RH V $\beta$ 23                                            | AGT CTG AAA TAT TTG AAG ATC     | Chen <i>et al.</i> 1993 |
| RH V $\beta$ 24                                            | AAC ACT TCT TTC TGC TTT C       | Chen <i>et al.</i> 1993 |
| RH 3'-C $\beta$ 1                                          | GTG CTG ACC CCA CTG TGC ACC TC  | Chen <i>et al.</i> 1993 |
| RH 5'-C $\beta$ -FAM                                       | CACGTGGTTCGGGGTAGAAGCC          | In this study           |

## Peripheral blood CD4<sup>+</sup> T<sub>M</sub> subsets

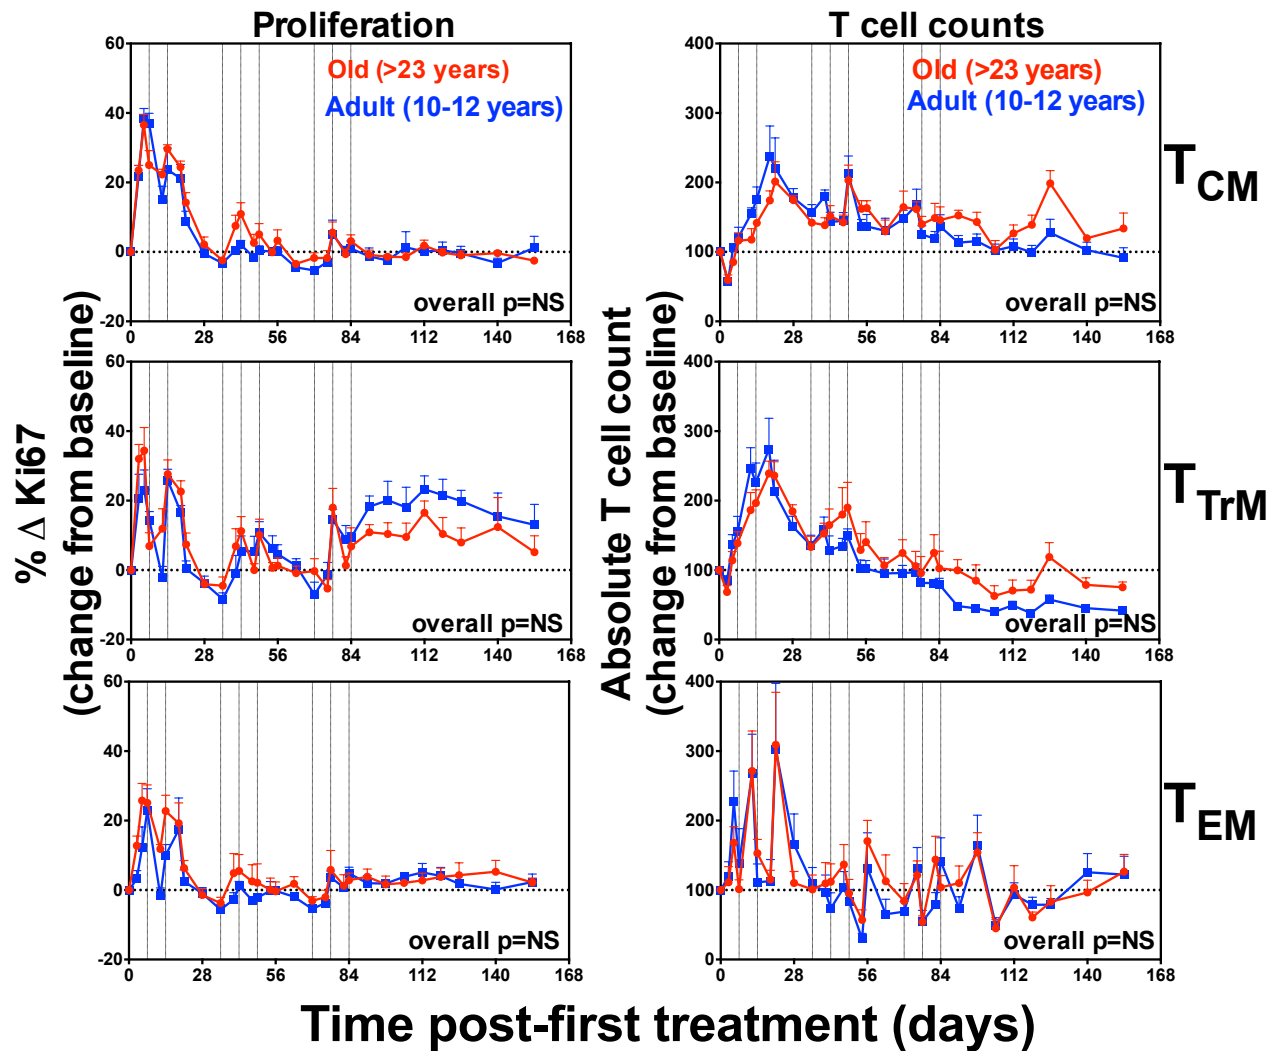

**Supplementary Figure 1.** Comparison of the absolute counts and proliferative fraction of CD4<sup>+</sup> T<sub>CM</sub>, T<sub>TrM</sub>, and T<sub>EM</sub> subsets in blood after s.c. injections of rsIL-7 (30μg/kg) on days 0, 7, 14, 35, 42, 49, 70, 77 and 84. Results (mean + SEM) are shown as percentage of Ki-67<sup>+</sup>, change (Δ) from baseline or absolute counts percentage of baseline. Significance of differences in these parameters between adult vs. old RM groups was assessed as described in the materials and methods (NS, non-significant).

## Peripheral blood CD8<sup>+</sup> T<sub>M</sub> subsets

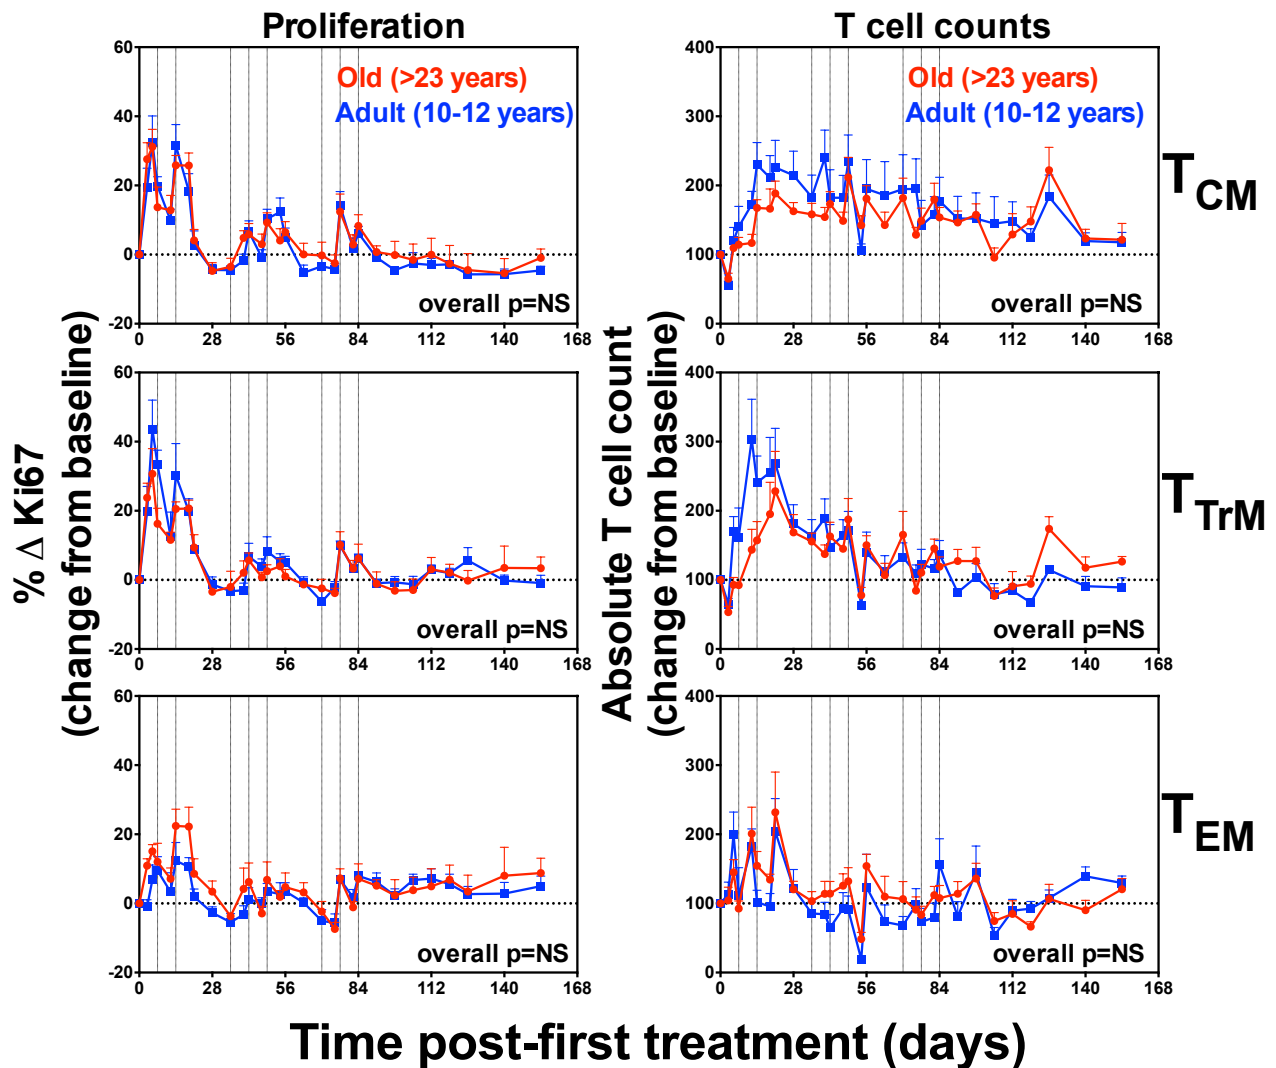

**Supplementary Figure 2.** Comparison of the absolute counts and proliferative fraction of CD8<sup>+</sup> T<sub>CM</sub>, T<sub>TrM</sub>, and T<sub>EM</sub> subsets in blood after s.c. injections of rsIL-7 (30μg/kg) on days 0, 7, 14, 35, 42, 49, 70, 77 and 84. Results (mean + SEM) are shown as percentage of Ki-67<sup>+</sup>, change (Δ) from baseline or absolute counts percentage of baseline. Significance of differences in these parameters between adult vs. old RM groups was assessed as described in the materials and methods (NS, non-significant).
